# Supplementary material
Source: publisher figshare collection journal article supplement (https://gsapubs.figshare.com/articles/dataset/_/12533885)
Supplement: Supplementary file 1 [file 1]

## Sheet: INDEX
Scibiorski, E., Tohver, E., Jourdan, F., Kirkland, C.L., and Spaggiari, C., 2016, Cooling and exhumation along the curved Albany-Fraser Orogen, Western Australia: Lithosphere, doi:10.1130/L561.1.
Two tabs are given for each mineral
1	The data table with the results of the incremental step heating
2	The plateau graph
Tabs are colour-coded by domain to aid navigation
Minerals are listed in the following order
Domain	Sample	Mineral	Plateau Age (Ma)	± 2σ	Excess argon
Northern Foreland	EAF011	Hb	1642	13	Yes
Fraser Zone	EAF046	Bt	1157	4
	EAF054	Bt	1205	4
	EAF055B	Hb	1217	8
	EAF060	Hb	no plateau
	EAF061	Bt1	no plateau
		Bt2	no plateau
Fraser Shear Zone	EAF051	Hb	no plateau
	EAF052	Hb	1234	6
Biranup Zone	EAF021	Bt1	1557	5	Yes
		Bt2	1304	4	Yes
	EAF022	Ms	1160	5
	EAF018	Bt	1167	4
	EAF020-2	Bt	1182	4	Yes
	EAF027	Ms	1154	5
	EAF029	Bt	1158	4
	EAF030	Hb	1270	7	Yes
	EAF035	Bt	1210	6	Yes
		Hb	1245	5	Yes
	EAF036	Hb1	1191	5
		Hb2	1190	5
		Bt1	1231	5	Yes
		Bt2	no plateau
	EAF017	Hb1	1192	4
		Hb2	1206	4	Yes
		Bt1	1243	5	Yes
		Bt2	1372	4	Yes
		Bt3	1333	5	Yes
	EAF015	Ms	1177	5
	EAF012	Hb	1194	6
		Bt	1212	4	Yes
	EAF038	Hb	1192	13
	EAF039B	Bt	1169	5
	EAF041	Bt	1233	6	Yes
	EAF042	Bt1	1281	4	Yes
		Bt2	1281	4	Yes
		Bt3	no plateau
	EAF037	Bt	1171	5

## Sheet: EAF011_Hb
	Incremental Heating			36Ar(a) [V]	37Ar(ca) [V]	38Ar(cl) [V]	39Ar(k) [V]	40Ar(r) [V]	Age	± 2s	40Ar(r)	39Ar(k)	K/Ca	± 2s
									(Ma)		(%)	(%)
	5M37251D	59.5	4	2.01108e-05	0.00146047	8.20123e-06	0.000111984	0.0122163	1403.05	675.541	67.0464	0.878207	0.032971	0.0151264
	5M37252D	60	4	8.08297e-07	0.0254381	1.0461e-05	0.00323233	0.449557	1653.21	25.4709	99.9458	25.3488	0.0546385	0.00364968
	5M37253D	60.5	4	-7.34812e-06	0.0495096	2.36372e-05	0.00685555	0.938168	1635.73	16.7193	100.234	53.7631	0.0595417	0.00320513
	5M37254D	61	4	-1.05976e-05	0.0174001	4.50294e-06	0.00240319	0.331575	1644.56	28.1609	100.963	18.8464	0.0593887	0.00399864
	5M37257D	62	4	-3.62181e-06	0.00189497	2.98407e-06	0.000148359	0.0223535	1741.32	444.491	105.083	1.16347	0.033665	0.0136267
			S	-6.48382e-07	0.0957033	4.97865e-05	0.0127514	1.75387
	Information on Analysis				Results		40(r)/39(k)	± 2s	Age	± 2s	MSWD	39Ar(k)	K/Ca	± 2s
									(Ma)			(%,n)
	Sample = EAF0011HBL				Age Plateau		137.599	1.59599	1641.63	13.2013	0.531374	100	0.0569544	0.0052945
	Material = Hbl							0.0115989		0.00804158	0.71269	5
	Location = Laser				Full External Error					16.4936	2.41421	2σ Confidence Limit
	Analyst = Fred Jourdan				Analytical Error					12.5129	1	Error Magnification
	Project = ALBANYFRASER_ES12
	Mass Discrimination Law = POW				Total Fusion Age		137.543	1.84066	1641.19	15.0351		5	0.0572928	0.00210316
	Irradiation = I19t40h							0.0133824		0.00916108
	J = 0.01074950 ± 0.00002096				Full External Error					17.9937
	FCs = 28.294 ± 0.031 Ma				Analytical Error					14.4346
	MDF	%1s
	1.00314	0.06

## Sheet: EAF046_Bt
	Incremental Heating			36Ar(a) [V]	37Ar(ca) [V]	38Ar(cl) [V]	39Ar(k) [V]	40Ar(r) [V]	Age	± 2s	40Ar(r)	39Ar(k)	K/Ca	± 2s
									(Ma)		(%)	(%)
	5M36239D	58		3.10831e-05	7.93271e-05	4.28178e-06	0.000788431	0.0559562	1032.82	114.154	85.7738	0.481623	4.27377	10.0461
	5M36240D	58.3	4	3.29321e-05	-0.000101196	2.56341e-05	0.0169148	1.40165	1160.1	15.0347	99.3025	10.3326	-71.8739	114.307
	5M36241D	58.6	4	1.27077e-05	-4.98495e-05	2.66662e-05	0.0424841	3.50435	1156.17	6.68108	99.891	25.9519	-366.466	1197.72
	5M36243D	59	4	1.85732e-06	0.00015793	7.81965e-05	0.0586029	4.83633	1156.6	4.03121	99.9877	35.7983	159.56	184.603
	5M36244D	60	4	-7.47941e-06	0.000762774	3.62548e-05	0.0426073	3.52655	1159.1	4.97112	100.062	26.0272	24.0191	8.09556
	5M36245D	61	4	5.80552e-06	0.000115875	4.57561e-07	0.00230557	0.184142	1128.86	32.4995	99.0666	1.40838	8.55569	15.6278
			S	7.69063e-05	0.00096486	0.000171491	0.163703	13.509
	Information on Analysis				Results		40(r)/39(k)	± 2s	Age	± 2s	MSWD	39Ar(k)	K/Ca	± 2s
									(Ma)			(%,n)
	Sample = EAF046BIO				Age Plateau		82.5867	0.268298	1157.22	4.27312	1.00061	99.5184	20.5786	10.3831
	Material = bio							0.00324868		0.00369258	0.405678	5
	Location = Laser				Full External Error					10.9782	2.41421	2σ Confidence Limit
	Analyst = Fred Jourdan				Analytical Error					2.77674	1.0003	Error Magnification
	Project = ALBANYFRASER_ES12
	Mass Discrimination Law = POW				Total Fusion Age		82.5212	0.300243	1156.54	4.49481		6	72.9559	36.3766
	Irradiation = I19t40h							0.00363837		0.00388643
	J = 0.01085500 ± 0.00002062				Full External Error					11.062
	WA1ms = 2613.000 ± 2.352 Ma				Analytical Error					3.10851
	MDF	%1s
	1.00312	0.07

## Sheet: EAF054_Bt
	Incremental Heating			36Ar(a) [V]	37Ar(ca) [V]	38Ar(cl) [V]	39Ar(k) [V]	40Ar(r) [V]	Age	± 2s	40Ar(r)	39Ar(k)	K/Ca	± 2s
									(Ma)		(%)	(%)
	5M36222D	58.3		1.95761e-05	0.000238829	0	0.00406476	0.342074	1173.38	16.7193	98.3193	2.296	7.3184	7.9274
	5M36223D	58.6	4	2.08698e-05	0.000564697	5.17068e-06	0.0174872	1.52999	1207.28	8.90324	99.5936	9.87774	13.316	7.05349
	5M36225D	59	4	1.34803e-05	0.00125989	2.30936e-05	0.0386466	3.37084	1204.57	4.88177	99.8799	21.8297	13.19	2.83635
	5M36226D	60	4	3.77051e-06	0.00179251	5.9319e-06	0.113618	9.91634	1205.12	3.11852	99.9878	64.1779	27.2556	4.2627
	5M36227D	61	4	7.70034e-06	0.0010319	4.0137e-06	0.00321975	0.275984	1189.32	19.2299	99.173	1.81869	1.3417	0.297597
			S	6.53971e-05	0.00488783	3.82099e-05	0.177037	15.4352
	Information on Analysis				Results		40(r)/39(k)	± 2s	Age	± 2s	MSWD	39Ar(k)	K/Ca	± 2s
									(Ma)			(%,n)
	Sample = EAF054BIO				Age Plateau		87.253	0.247928	1204.88	4.17328	0.991638	97.704	1.61493	2.55891
	Material = bio							0.00284148		0.00346365	0.395509	4
	Location = Laser				Full External Error					11.2472	2.63299	2σ Confidence Limit
	Analyst = Fred Jourdan				Analytical Error					2.49917	1	Error Magnification
	Project = ALBANYFRASER_ES12
	Mass Discrimination Law = POW				Total Fusion Age		87.1865	0.24657	1204.21	4.1646		5	15.5746	1.91322
	Irradiation = I19t40h							0.00282808		0.00345837
	J = 0.01085500 ± 0.00002062				Full External Error					11.2396
	WA1ms = 2613.000 ± 2.352 Ma				Analytical Error					2.4864
	MDF	%1s
	1.00312	0.07

## Sheet: EAF055B_Hb
	Incremental Heating			36Ar(a) [V]	37Ar(ca) [V]	38Ar(cl) [V]	39Ar(k) [V]	40Ar(r) [V]	Age	± 2s	40Ar(r)	39Ar(k)	K/Ca	± 2s
									(Ma)		(%)	(%)
	5M37448D	59.5		1.23557e-05	0.0023959	1.97312e-06	0.00086995	0.0738286	1173	51.5482	95.2404	3.75309	0.156133	0.0534964
	5M37449D	60	4	1.09296e-05	0.0354418	5.23624e-05	0.0117188	1.05103	1221.38	8.58893	99.6897	50.5565	0.142179	0.00869645
	5M37450D	60.5	4	4.91915e-06	0.0138971	3.91948e-05	0.00500179	0.441699	1207.67	13.152	99.6678	21.5784	0.154764	0.0143497
	5M37451D	61	4	5.66221e-06	0.0140771	2.42562e-05	0.00499872	0.44505	1214.88	10.4992	99.6208	21.5652	0.152691	0.013685
	5M37453D	61.5	4	6.25642e-06	0.00135982	1.14745e-05	0.000590332	0.0546419	1249.61	67.4643	96.6938	2.54678	0.186674	0.108992
			S	4.01231e-05	0.0671717	0.000129261	0.0231796	2.06625
	Information on Analysis				Results		40(r)/39(k)	± 2s	Age	± 2s	MSWD	39Ar(k)	K/Ca	± 2s
									(Ma)			(%,n)
	Sample = EAF0055BHBL				Age Plateau		89.2195	0.698938	1216.74	7.74992	1.37792	96.2469	0.147327	0.00715755
	Material = Hbl							0.00783391		0.00636941	0.247378	4
	Location = Laser				Full External Error					10.9318	2.63299	2σ Confidence Limit
	Analyst = Fred Jourdan				Analytical Error					6.93773	1.17385	Error Magnification
	Project = ALBANYFRASER_ES12
	Mass Discrimination Law = POW				Total Fusion Age		89.1409	0.625919	1215.96	7.11001		5	0.148384	0.00671938
	Irradiation = I19t40h							0.00702168		0.00584724
	J = 0.01075940 ± 0.00002098				Full External Error					10.4847
	FCs = 28.294 ± 0.037 Ma				Analytical Error					6.21562
	MDF	%1s
	1.00324	0.05

## Sheet: EAF060_Hb
	Incremental Heating			36Ar(a) [V]	37Ar(ca) [V]	38Ar(cl) [V]	39Ar(k) [V]	40Ar(r) [V]	Age	± 2s	40Ar(r)	39Ar(k)	K/Ca	± 2s
									(Ma)		(%)	(%)
	5M38073D	60		5.81411e-06	0.00223438	1.13108e-06	8.08548e-06	0.0485413	7580.15	3278.14	96.5474	3.2799	0.00155603	0.00314221
	5M38074D	60.4		1.29038e-05	0.00275861	0	6.42293e-06	0.0107617	5341.78	3087.18	73.6384	2.60549	0.00100118	0.00193653
	5M38075D	60.6		5.65861e-06	0.00306146	0	4.60204e-05	0.020583	3195.54	787.167	92.4145	18.6683	0.00646384	0.00465983
	5M38077D	60.8		-1.44407e-06	0.0083999	0	0.000185987	0.0229257	1535.69	229.522	101.916	75.4463	0.00952087	0.00278605
			S	2.29324e-05	0.0164543	1.13108e-06	0.000246516	0.102812
	Information on Analysis				Results		40(r)/39(k)	± 2s	Age	± 2s	MSWD	39Ar(k)	K/Ca	± 2s
									(Ma)			(%,n)
	Sample = EAF0060HBL				Age Plateau Cannot Calculate
	Material = Hbl
	Location = Laser
	Analyst = Fred Jourdan
	Project = ALBANYFRASER_ES12
	Mass Discrimination Law = POW				Total Fusion Age		417.06	71.2276	3091.36	252.998		4	0.00644217	0.0018159
	Irradiation = I19t40h							0.170785		0.0818404
	J = 0.01085500 ± 0.00002062				Full External Error					253.58
	FCs = 28.294 ± 0.037 Ma				Analytical Error					252.936
	MDF	%1s
	1.00329	0.05

## Sheet: EAF061_Bt1
	Incremental Heating			36Ar(a) [V]	37Ar(ca) [V]	38Ar(cl) [V]	39Ar(k) [V]	40Ar(r) [V]	Age	± 2s	40Ar(r)	39Ar(k)	K/Ca	± 2s
									(Ma)		(%)	(%)
	5M36211D	58.3		5.54791e-05	-7.68949e-05	0	0.0131715	0.926084	1025.47	5.52586	98.2418	7.04783	-73.6557	215.807
	5M36212D~	58.6		0.000129434	0.00184496	0	0.10965	8.84123	1136.87	3.80712	99.5639	58.6716	25.5558	4.07245
	5M36215D	60		1.84908e-05	-5.59682e-05	0	0.0568526	4.83618	1182.69	3.22822	99.8851	30.4208	-436.795	1688.41
	5M36216D	61		5.20037e-06	0.000120785	9.00904e-06	0.00624063	0.51909	1163.34	14.4976	99.7009	3.33925	22.217	38.603
	5M36217D	63		-1.8152e-06	-5.53717e-05	8.5726e-07	0.000972872	0.0841596	1197.33	69.5545	100.647	0.520566	-7.55503	27.6887
			S	0.000206789	0.00177751	9.8663e-06	0.186887	15.2067
	Information on Analysis				Results		40(r)/39(k)	± 2s	Age	± 2s	MSWD	39Ar(k)	K/Ca	± 2s
									(Ma)			(%,n)
	Sample = EAF061BIO				Age Plateau Cannot Calculate
	Material = bio
	Location = Laser
	Analyst = Fred Jourdan
	Project = ALBANYFRASER_ES12
	Mass Discrimination Law = POW				Total Fusion Age		81.3685	0.243972	1144.56	4.10488		5	45.2102	13.1964
	Irradiation = I19t40h							0.00299836		0.00358641
	J = 0.01085500 ± 0.00002062				Full External Error					10.8314
	WA1ms = 2613.000 ± 2.352 Ma				Analytical Error					2.54271
	MDF	%1s
	1.00312	0.07

## Sheet: EAF061_Bt2
	Incremental Heating			36Ar(a) [V]	37Ar(ca) [V]	38Ar(cl) [V]	39Ar(k) [V]	40Ar(r) [V]	Age	± 2s	40Ar(r)	39Ar(k)	K/Ca	± 2s
									(Ma)		(%)	(%)
	5M38055D	59.8		-1.03524e-05	-0.00075724	0	0.00096848	0.0730781	1081.88	54.5486	104.415	0.350129	-0.549953	1.323
	5M38056D	60		1.3988e-05	0.000127798	2.12909e-06	0.00260555	0.181242	1017.11	25.6662	97.7467	0.941972	8.76687	110.151
	5M38058D	60.1		3.62981e-05	-0.000838781	1.02853e-05	0.00791283	0.586909	1067.96	11.0878	98.186	2.86068	-4.0565	8.68263
	5M38059D	60.2		7.88054e-06	-0.000725027	0	0.0123554	0.997002	1137.52	5.0945	99.7637	4.46678	-7.32776	16.8433
	5M38060D	60.3		5.51523e-05	-0.00155361	0	0.0726366	5.95404	1150.83	3.58318	99.7233	26.2599	-20.1039	25.7051
	5M38061D	60.4		1.51435e-05	-0.00192492	0	0.0582293	4.83544	1161.92	3.78541	99.9057	21.0513	-13.0076	12.3875
	5M38063D	60.5		9.15013e-07	-0.00119066	0	0.0528012	4.45516	1175.64	1.93541	99.993	19.0889	-19.0689	29.2674
	5M38064D	60.6		8.10676e-07	-0.00202903	1.23812e-05	0.026501	2.22889	1172.87	5.30837	99.9883	9.58077	-5.61621	4.6196
	5M38065D	60.7		-1.30295e-06	-0.00226088	0	0.0107752	0.904898	1171.58	8.82332	100.042	3.89549	-2.04935	1.58517
	5M38066D	60.8		6.43402e-06	-0.00179203	0	0.00897388	0.750115	1167.56	12.2951	99.7437	3.24428	-2.15329	2.24271
	5M38068D	60.9		1.1814e-05	-0.00090717	0	0.00524143	0.436511	1164.39	13.8045	99.1976	1.89491	-2.48445	4.68514
	5M38069D	61.5		1.13476e-05	7.73021e-05	0	0.0154344	1.31558	1184.44	6.82019	99.7423	5.57991	85.8552	2037.51
	5M38070D	63		1.58061e-05	-0.000702755	0	0.00177765	0.146435	1155.03	36.2839	96.8771	0.642664	-1.0877	3.30916
	5M38071D	66		2.92376e-06	-0.000348361	0	0.000393479	0.0317662	1137.91	138.584	97.3247	0.142252	-0.485692	2.45701
			S	0.000166858	-0.0148254	2.47956e-05	0.276606	22.8971
	Information on Analysis				Results		40(r)/39(k)	± 2s	Age	± 2s	MSWD	39Ar(k)	K/Ca	± 2s
									(Ma)			(%,n)
	Sample = EAF0061BIO				Age Plateau Cannot Calculate
	Material = Bio
	Location = Laser
	Analyst = Fred Jourdan
	Project = ALBANYFRASER_ES12
	Mass Discrimination Law = POW				Total Fusion Age		82.7785	0.160109	1159.2	3.64895		14	-8.02279	3.66379
	Irradiation = I19t40h							0.00193419		0.00314782
	J = 0.01085500 ± 0.00002062				Full External Error					8.24039
	FCs = 28.294 ± 0.037 Ma				Analytical Error					1.65523
	MDF	%1s
	1.00329	0.05

## Sheet: EAF051_Hb
	Incremental Heating			36Ar(a) [V]	37Ar(ca) [V]	38Ar(cl) [V]	39Ar(k) [V]	40Ar(r) [V]	Age	± 2s	40Ar(r)	39Ar(k)	K/Ca	± 2s
									(Ma)		(%)	(%)
	5M36674D	65	4	3.59188e-05	0.0128134	1.19241e-06	0.00426821	0.331864	1099.18	18.3864	96.8688	100	0.143235	0.00853569
			S	3.59188e-05	0.0128134	1.19241e-06	0.00426821	0.331864
	Information on Analysis				Results		40(r)/39(k)	± 2s	Age	± 2s	MSWD	39Ar(k)	K/Ca	± 2s
									(Ma)			(%,n)
	Sample = EAF0051				Age Plateau Cannot Calculate
	Material = Hbl
	Location = Laser
	Analyst = Fred Jourdan
	Project = ALBANYFRASER_ES12
	Mass Discrimination Law = POW				Total Fusion Age		77.7525	1.73573	1099.18	18.6649		1	0.143235	0.00853569
	Irradiation = I19t40h							0.0223237		0.0169808
	J = 0.01075940 ± 0.00002098				Full External Error					19.9234
	FCs = 28.294 ± 0.037 Ma				Analytical Error					18.3864
	MDF	%1s
	1.00336	0.06

## Sheet: EAF052_Hb
	Incremental Heating			36Ar(a) [V]	37Ar(ca) [V]	38Ar(cl) [V]	39Ar(k) [V]	40Ar(r) [V]	Age	± 2s	40Ar(r)	39Ar(k)	K/Ca	± 2s
									(Ma)		(%)	(%)
	5M37315D	59.5		7.69252e-06	0.000757364	6.50345e-06	0.000313079	0.0241196	1091.61	135.137	91.305	0.790721	0.177754	0.186428
	5M37316D	60		1.10827e-05	0.0289093	2.07362e-05	0.00986619	0.876603	1213.06	8.13083	99.6231	24.9183	0.146751	0.00867126
	5M37317D	60.5	4	-8.28537e-06	0.0678498	6.207e-05	0.0216901	1.97647	1235.54	4.91782	100.125	54.781	0.137462	0.00692256
	5M37318D	61	4	3.66407e-06	0.0124422	3.59381e-06	0.00387553	0.348502	1223.72	16.4971	99.6863	9.78814	0.133938	0.011324
	5M37320D	61.5	4	1.11434e-05	0.00895657	1.59391e-05	0.00288905	0.260155	1224.95	22.0186	98.7365	7.29665	0.138702	0.0193639
	5M37321D	62	4	1.24852e-05	0.00283356	4.68699e-06	0.000960217	0.0860691	1220.86	43.2667	95.8481	2.42515	0.145716	0.0414078
			S	3.77825e-05	0.121749	0.00011353	0.0395941	3.57192
	Information on Analysis				Results		40(r)/39(k)	± 2s	Age	± 2s	MSWD	39Ar(k)	K/Ca	± 2s
									(Ma)			(%,n)
	Sample = EAF0052HBL				Age Plateau		90.9656	0.466445	1233.99	5.76176	1.00151	74.291	0.136855	0.00559754
	Material = Hbl							0.00512771		0.00466921	0.390928	4
	Location = Laser				Full External Error					9.62125	2.63299	2σ Confidence Limit
	Analyst = Fred Jourdan				Analytical Error					4.58603	1.00075	Error Magnification
	Project = ALBANYFRASER_ES12
	Mass Discrimination Law = POW				Total Fusion Age		90.2133	0.437355	1226.58	5.54136		6	0.139841	0.00494616
	Irradiation = I19t40h							0.00484801		0.00451774
	J = 0.01075940 ± 0.00002098				Full External Error					9.45779
	FCs = 28.294 ± 0.031 Ma				Analytical Error					4.31768
	MDF	%1s
	1.00294	0.07

[truncated: 59 more sheets: EAF052_Hb_Plateau, EAF021_Bt1, EAF021_Bt1_Plateau, EAF021_Bt2, EAF021_Bt2_Plateau, EAF022_Ms, EAF022_Ms_Plateau, EAF018_Bt, EAF018_Bt_Plateau, EAF020-2_Bt, EAF02-2_Bt_Plateau, EAF027_Ms, EAF027_Ms_Plateau, EAF029_Bt, EAF029_Bt_Plateau, EAF030_Hb, EAF030_Hb_Plateau, EAF035_Bt, EAF035_Bt_Plateau, EAF035_Hb …]
