# Supplementary material
Source: publisher figshare collection journal article supplement (https://gsapubs.figshare.com/articles/dataset/_/12533885)
Supplement: Supplementary file 1 [file 1]

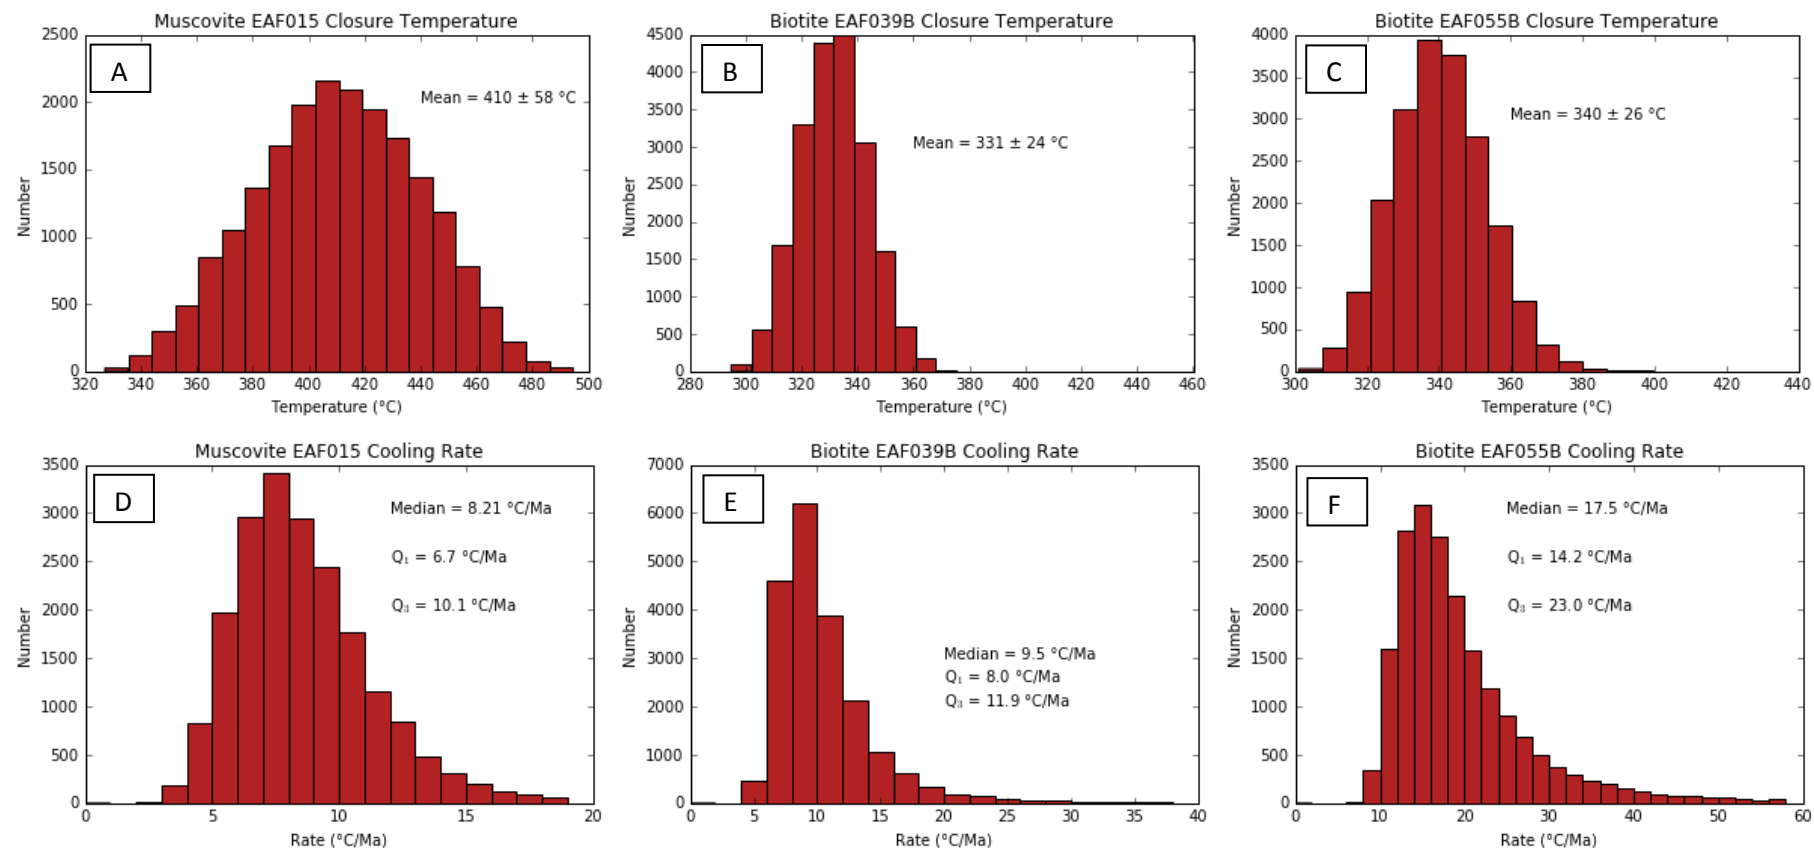

Supplemental Figure 1. (A,B,C) Histograms showing the results of the Monte Carlo simulation modeling the  $^{40}\text{Ar}/^{39}\text{Ar}$  closure temperature in muscovite and biotite. The mean is reported with  $\pm 2$  sigma. (D, E, F) Histograms showing the results of the Monte Carlo simulation modeling the cooling rate between hornblende and mica closure temperature. The strongly right-tailed skew of the histograms is due to the large range in mathematically calculated cooling rates. This also skews the mean and standard deviation to unrealistically high values. For this reason, the median is a better measure of the central tendency of these populations, and the inter-quartile range is a more robust measure of scale than the standard deviation.

**Supplementary Table 1** Initial inputs to Dodson's equation (Equation 1 above).

| Locality           | Hornblende cooling age |                                  | Mica cooling age |         |                                  | Mineral Constants               |                       |                |                                  |     |
|--------------------|------------------------|----------------------------------|------------------|---------|----------------------------------|---------------------------------|-----------------------|----------------|----------------------------------|-----|
|                    | Sample                 | Cooling age (Ma, $\pm 2\sigma$ ) | Sample           | Mineral | Cooling age (Ma, $\pm 2\sigma$ ) | $T_{Co}$ ( $^{\circ}\text{C}$ ) | $a$ ( $\mu\text{m}$ ) | $E$ (kcal/mol) | $D_0$ ( $\text{cm}^2/\text{s}$ ) | $A$ |
| Biranup Zone       |                        |                                  |                  |         |                                  |                                 |                       |                |                                  |     |
| SW of Urayrie Rock | EAF012                 | 1194 $\pm$ 6                     | EAF015           | Ms      | 1177 $\pm$ 5                     | 425                             | 350                   | 63 $\pm$ 7     | 2.3 $^{+70}_{-2.2}$              | 55  |
| Ponton Creek       | EAF038                 | 1192 $\pm$ 13                    | EAF039B          | Bt      | 1169 $\pm$ 5                     | 300                             | 350                   | 50.5 $\pm$ 2.2 | 0.4 $^{+0.96}_{-0.28}$           | 27  |
| Fraser Zone        |                        |                                  |                  |         |                                  |                                 |                       |                |                                  |     |
| Wyralinu Hill      | EAF055B                | 1217 $\pm$ 8                     | EAF054           | Bt      | 1205 $\pm$ 4                     | 300                             | 350                   | 50.5 $\pm$ 2.2 | 0.4 $^{+0.96}_{-0.28}$           | 27  |

Values for the activation energy ( $E$ ), diffusion coefficient ( $D_0$ ) and volume constant ( $A$ ) for biotite were taken from Grove and Harrison (1996), as biotites analysed in this study have similar Fe/Mg ratios. The initial closure temperature estimates ( $T_{Co}$ ) for biotite was 300  $^{\circ}\text{C}$  (Harrison et al., 1985). Values for the activation energy ( $E$ ), diffusion coefficient ( $D_0$ ), volume constant ( $A$ ) and the initial closure temperature estimate ( $T_{Co}$ ) of 425  $^{\circ}\text{C}$  for muscovite were taken from Harrison et al. (2009). Grainsize ( $a$ ) was estimated at the time of  $^{40}\text{Ar}/^{39}\text{Ar}$  analysis.

References Cited:

Grove, M., and Harrison, T.M., 1996,  $^{40}\text{Ar}^*$  diffusion in Fe-rich biotite: The American Mineralogist, v. 81, p. 940–951, doi:10.2138/am-1996-7-816.

Harrison, T.M., C  lerier, J., Aikman, A.B., Hermann, J., and Heizler, M.T., 2009, Diffusion of  $^{40}\text{Ar}$  in muscovite: Geochimica et Cosmochimica Acta, v. 73, p. 1039–1051, doi:10.1016/j.gca.2008.09.038.

**Supplementary Table 2** Probability distributions and values of variables used in the Monte Carlo simulation.

| Variable                                                                   | Input Probability Distribution | Value                                                                                                                                                                                                                                                             | Source                    |
|----------------------------------------------------------------------------|--------------------------------|-------------------------------------------------------------------------------------------------------------------------------------------------------------------------------------------------------------------------------------------------------------------|---------------------------|
| Hornblende                                                                 |                                |                                                                                                                                                                                                                                                                   |                           |
| $^{40}\text{Ar}/^{39}\text{Ar}$ age (Ma)                                   | Normal (mean, $\sigma$ )       | Varies for each mineral                                                                                                                                                                                                                                           | Table 3                   |
| Biotite                                                                    |                                |                                                                                                                                                                                                                                                                   |                           |
| $E$                                                                        | Triangular (min, mode, max)    | 50.5 $\pm$ 2.2 kcal/mol                                                                                                                                                                                                                                           | Grove and Harrison (1996) |
| $D_0$                                                                      | Triangular (min, mode, max)    | 0.4 $^{+0.96}_{-0.28}$ $\text{cm}^2/\text{s}$                                                                                                                                                                                                                     |                           |
| Muscovite                                                                  |                                |                                                                                                                                                                                                                                                                   |                           |
| $E$                                                                        | Triangular (min, mode, max)    | 63 $\pm$ 7 kcal/mol                                                                                                                                                                                                                                               | Harrison et al. (2009)    |
| $D_0$                                                                      | Triangular (min, mode, max)    | 2.3 $^{+70}_{-2.2}$ $\text{cm}^2/\text{s}$                                                                                                                                                                                                                        |                           |
| Mica                                                                       |                                |                                                                                                                                                                                                                                                                   |                           |
| $^{40}\text{Ar}/^{39}\text{Ar}$ cooling age (Ma)                           | Normal (mean, $\sigma$ )       | Varies for each mineral                                                                                                                                                                                                                                           | Table 3                   |
| $^{40}\text{Ar}/^{39}\text{Ar}$ closure temperature ( $^{\circ}\text{C}$ ) | n/a                            | Directly calculated by iterating Equation 1                                                                                                                                                                                                                       |                           |
| Cooling rate ( $^{\circ}\text{C}/\text{Ma}$ )                              | n/a                            | Initially calculated based on hornblende cooling age and closure temperature, and mica cooling age and initial closure temperature ( $T_{Co}$ ). Cooling rate is recalculated after each iteration of Equation 1, using the newly calculated closure temperature. |                           |

The uncertainty of each random variable was modelled using either a uniform, triangular or normal probability distribution. The values of all other variables in Equation 1 are the same as those in Supplementary Table 1.
